# Supplementary material for: Analysis of expression profiles and prognostic value of COP9 signalosome subunits for patients with head and neck squamous cell carcinoma
Source: PubMed Central journal article supplement — Oncol Lett. 2021 Sep 23;22(5):803. doi: 10.3892/ol.2021.13064 (PMC8477071; doi:10.3892/ol.2021.13064), 2021-09-23
Supplement: Supplementary_Data.pdf [file Supplementary_Data.pdf]

Figure S1. Protein expression level of the COPS subunits in HNSCC. Protein expression level of (A) COPS2, (B) COPS3, (C) COPS4, (D) COPS7A, (E) COPS7B and (F) COPS9 in normal oral tissues and HNSCC from the Human Protein Atlas Portal. COPS, COP9 signalosome 1x10<sup>1</sup>.

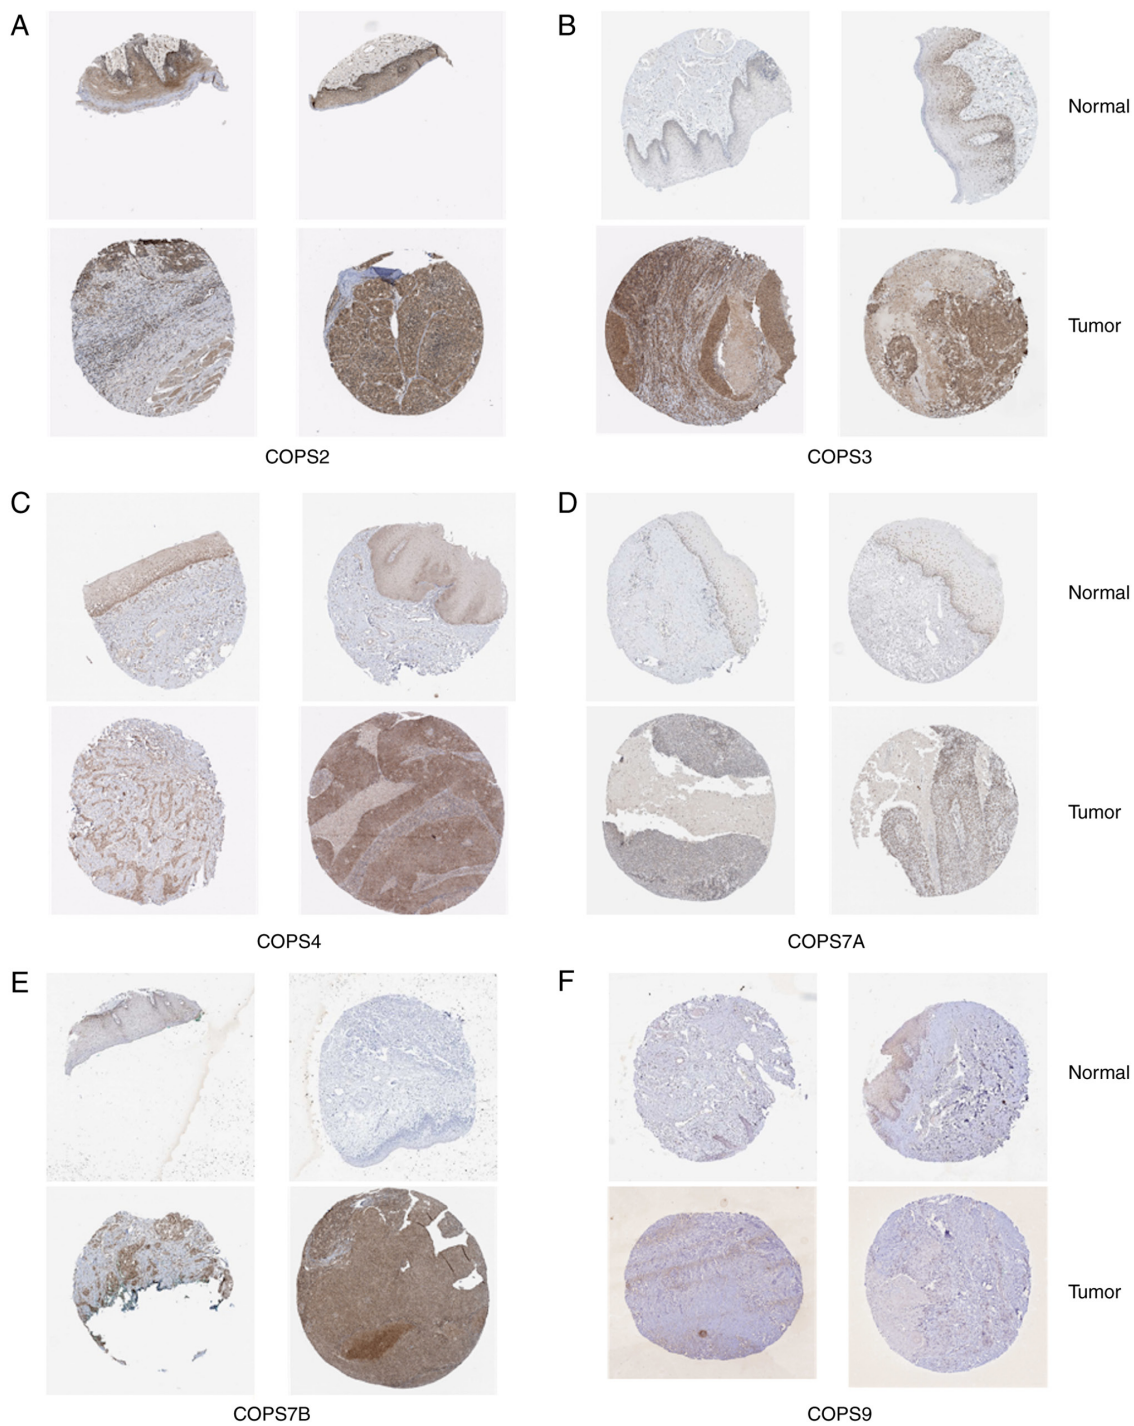

Table SI. Biological process terms of the COPS subunits from Gene Ontology functional enrichment analysis.

| Description                                                                        | P-value                | Gene count | Gene ratio |
|------------------------------------------------------------------------------------|------------------------|------------|------------|
| Protein ubiquitination involved in ubiquitin-dependent protein catabolic process   | 9.90x10 <sup>-17</sup> | 14         | 29.166     |
| Protein neddylation                                                                | 1.03x10 <sup>-15</sup> | 8          | 16.666     |
| Regulation of sequence-specific DNA binding transcription factor activity          | 2.82x10 <sup>-13</sup> | 8          | 16.666     |
| Protein ubiquitination                                                             | 2.97x10 <sup>-13</sup> | 15         | 31.250     |
| Proteasome-mediated ubiquitin-dependent protein catabolic process                  | 1.18x10 <sup>-10</sup> | 11         | 22.916     |
| Fc-epsilon receptor signaling pathway                                              | 8.81x10 <sup>-10</sup> | 10         | 20.833     |
| Ubiquitin-dependent protein catabolic process                                      | 1.07x10 <sup>-09</sup> | 10         | 20.833     |
| SCF-dependent proteasomal ubiquitin-dependent protein catabolic process            | 4.50x10 <sup>-09</sup> | 6          | 12.500     |
| Regulation of transcription from RNA polymerase II promoter in response to hypoxia | 1.03x10 <sup>-08</sup> | 6          | 12.500     |
| Viral process                                                                      | 8.06x10 <sup>-08</sup> | 10         | 20.833     |
| Nucleotide-excision repair, preincision complex stabilization                      | 2.60x10 <sup>-07</sup> | 5          | 10.416     |
| G <sub>1</sub> /S transition of mitotic cell cycle                                 | 2.91x10 <sup>-07</sup> | 7          | 14.583     |
| Nucleotide-excision repair, DNA duplex unwinding                                   | 3.18x10 <sup>-07</sup> | 5          | 10.416     |
| Nucleotide-excision repair, DNA damage recognition                                 | 3.84x10 <sup>-07</sup> | 5          | 10.416     |
| Nucleotide-excision repair, DNA incision, 3'-to lesion                             | 3.84x10 <sup>-07</sup> | 5          | 10.416     |
| Protein polyubiquitination                                                         | 5.40x10 <sup>-07</sup> | 8          | 16.666     |
| Nucleotide-excision repair, preincision complex assembly                           | 1.02x10 <sup>-06</sup> | 5          | 10.416     |
| Intrinsic apoptotic signaling pathway                                              | 1.17x10 <sup>-06</sup> | 5          | 10.416     |
| Global genome nucleotide-excision repair                                           | 1.53x10 <sup>-06</sup> | 5          | 10.416     |
| Nucleotide-excision repair, DNA incision, 5'-to lesion                             | 2.79x10 <sup>-06</sup> | 5          | 10.416     |
| Nucleotide-excision repair, DNA incision                                           | 3.11x10 <sup>-06</sup> | 5          | 10.416     |
| Histone H2A monoubiquitination                                                     | 3.89x10 <sup>-06</sup> | 4          | 8.333      |
| Positive regulation of cyclase activity                                            | 2.10x10 <sup>-05</sup> | 3          | 6.250      |
| JUN phosphorylation                                                                | 4.20x10 <sup>-05</sup> | 3          | 6.250      |
| DNA damage response, detection of DNA damage                                       | 1.21x10 <sup>-04</sup> | 4          | 8.333      |
| Regulation of circadian rhythm                                                     | 3.04x10 <sup>-04</sup> | 4          | 8.333      |
| UV-damage excision repair                                                          | 3.80x10 <sup>-04</sup> | 3          | 6.250      |
| Regulation of ossification                                                         | 3.80x10 <sup>-04</sup> | 3          | 6.250      |
| Positive regulation of transcription, DNA-templated                                | 4.05x10 <sup>-04</sup> | 8          | 16.666     |
| Rhythmic process                                                                   | 4.05x10 <sup>-04</sup> | 4          | 8.333      |
| Cell cycle arrest                                                                  | 5.43x10 <sup>-04</sup> | 5          | 10.416     |
| NIK/NF-kb signaling                                                                | 7.31x10 <sup>-04</sup> | 4          | 8.3333     |
| Response to muscle stretch                                                         | 8.23x10 <sup>-04</sup> | 3          | 6.250      |
| Transcription-coupled nucleotide-excision repair                                   | 1.00x10 <sup>-03</sup> | 4          | 8.3333     |
| Wnt signaling pathway                                                              | 2.00x10 <sup>-03</sup> | 5          | 10.416     |
| Transforming growth factor $\beta$ receptor signaling pathway                      | 2.00x10 <sup>-03</sup> | 4          | 8.333      |
| Cellular response to DNA damage stimulus                                           | 2.00x10 <sup>-03</sup> | 5          | 10.416     |
| Transcription from RNA polymerase II promoter                                      | 2.00x10 <sup>-03</sup> | 7          | 14.583     |
| Protein monoubiquitination                                                         | 3.00x10 <sup>-03</sup> | 3          | 6.250      |
| Cellular protein modification process                                              | 3.00x10 <sup>-03</sup> | 4          | 8.333      |
| Activation of MAPK activity                                                        | 3.00x10 <sup>-03</sup> | 4          | 8.333      |
| Lipopolysaccharide-mediated signaling pathway                                      | 3.00x10 <sup>-03</sup> | 3          | 6.250      |
| Negative regulation of cell proliferation                                          | 4.00x10 <sup>-03</sup> | 6          | 12.500     |
| Peptidyl-serine phosphorylation                                                    | 5.00x10 <sup>-03</sup> | 4          | 8.333      |
| Positive regulation of neuron apoptotic process                                    | 6.00x10 <sup>-03</sup> | 3          | 6.250      |
| Regulation of transcription from RNA polymerase II promoter                        | 6.00x10 <sup>-03</sup> | 6          | 12.500     |
| Cellular response to hormone stimulus                                              | 6.00x10 <sup>-03</sup> | 3          | 6.250      |
| Response to camp                                                                   | 7.00x10 <sup>-03</sup> | 3          | 6.250      |
| JNK cascade                                                                        | 8.00x10 <sup>-03</sup> | 3          | 6.250      |
| Cardiac neural crest cell development involved in heart development                | 8.00x10 <sup>-03</sup> | 2          | 4.166      |
| MAPK import into nucleus                                                           | 8.00x10 <sup>-03</sup> | 2          | 4.166      |
| Cellular response to calcium ion                                                   | 8.00x10 <sup>-03</sup> | 3          | 6.250      |

Table SI. Continued.

| Description                                                          | P-value                | Gene count | Gene ratio |
|----------------------------------------------------------------------|------------------------|------------|------------|
| Negative regulation of canonical Wnt signaling pathway               | 9.00x10 <sup>-03</sup> | 4          | 8.333      |
| Response to epidermal growth factor                                  | 1.00x10 <sup>-02</sup> | 2          | 4.166      |
| Regulation of Golgi inheritance                                      | 1.10x10 <sup>-02</sup> | 2          | 4.166      |
| Response to stress                                                   | 1.20x10 <sup>-02</sup> | 3          | 6.250      |
| Caveolin-mediated endocytosis                                        | 1.30x10 <sup>-02</sup> | 2          | 4.166      |
| Positive regulation of transcription from RNA polymerase II promoter | 1.50x10 <sup>-02</sup> | 8          | 16.66      |
| Trachea formation                                                    | 1.60x10 <sup>-02</sup> | 2          | 4.166      |
| Cell cycle                                                           | 2.00x10 <sup>-02</sup> | 4          | 8.333      |
| Regulation of stress-activated MAPK cascade                          | 2.10x10 <sup>-02</sup> | 2          | 4.166      |
| Regulation of early endosome to late endosome transport              | 2.10x10 <sup>-02</sup> | 2          | 4.166      |
| Response to toxic substance                                          | 2.20x10 <sup>-02</sup> | 3          | 6.250      |
| Bergmann glial cell differentiation                                  | 2.40x10 <sup>-02</sup> | 2          | 4.166      |
| Outer ear morphogenesis                                              | 2.40x10 <sup>-02</sup> | 2          | 4.166      |
| MAPK cascade                                                         | 3.30x10 <sup>-02</sup> | 4          | 8.333      |
| Protein phosphorylation                                              | 3.30x10 <sup>-02</sup> | 5          | 10.416     |
| Lung morphogenesis                                                   | 3.40x10 <sup>-02</sup> | 2          | 4.166      |
| Interleukin-1-mediated signaling pathway                             | 3.70x10 <sup>-02</sup> | 2          | 4.166      |
| JAK-STAT cascade involved in growth hormone signaling pathway        | 3.90x10 <sup>-02</sup> | 2          | 4.166      |
| Positive regulation of telomere capping                              | 4.20x10 <sup>-02</sup> | 2          | 4.166      |
| Regulation of cell cycle                                             | 4.40x10 <sup>-02</sup> | 3          | 6.250      |
| Response to light stimulus                                           | 4.50x10 <sup>-02</sup> | 2          | 4.166      |
| Positive regulation of myoblast fusion                               | 4.50x10 <sup>-02</sup> | 2          | 4.166      |
| Response to corticosterone                                           | 4.70x10 <sup>-02</sup> | 2          | 4.166      |
| Face development                                                     | 4.70x10 <sup>-02</sup> | 2          | 4.166      |
| Response to drug                                                     | 4.80x10 <sup>-02</sup> | 4          | 8.333      |
| Regulation of cytoskeleton organization                              | 5.00x10 <sup>-02</sup> | 2          | 4.166      |
| COPS, COP9 signalosome.                                              |                        |            |            |

Table SII. Cellular component terms of the COPS subunits from Gene Ontology functional enrichment analysis.

| Description                                | P-value                | Gene count | Gene ratio |
|--------------------------------------------|------------------------|------------|------------|
| SCF ubiquitin ligase complex               | $2.51 \times 10^{-19}$ | 12         | 25.000     |
| Nucleoplasm                                | $2.28 \times 10^{-13}$ | 30         | 62.500     |
| Cullin-RING ubiquitin ligase complex       | $1.02 \times 10^{-11}$ | 6          | 12.500     |
| Cul3-RING ubiquitin ligase complex         | $3.14 \times 10^{-10}$ | 8          | 16.666     |
| Cytosol                                    | $1.05 \times 10^{-09}$ | 28         | 58.333     |
| VCB complex                                | $1.24 \times 10^{-09}$ | 5          | 10.416     |
| Cul4B-RING E3 ubiquitin ligase complex     | $1.50 \times 10^{-07}$ | 4          | 8.333      |
| Cul5-RING ubiquitin ligase complex         | $5.23 \times 10^{-07}$ | 4          | 8.333      |
| Cul4A-RING E3 ubiquitin ligase complex     | $1.78 \times 10^{-06}$ | 4          | 8.333      |
| Cul2-RING ubiquitin ligase complex         | $3.26 \times 10^{-06}$ | 4          | 8.333      |
| Cul4-RING E3 ubiquitin ligase complex      | $9.98 \times 10^{-06}$ | 4          | 8.333      |
| Cul7-RING ubiquitin ligase complex         | $6.20 \times 10^{-05}$ | 3          | 6.250      |
| Nucleus                                    | $4.13 \times 10^{-04}$ | 26         | 54.166     |
| Nuclear SCF ubiquitin ligase complex       | $5.00 \times 10^{-03}$ | 2          | 4.166      |
| Parkin-FBXW7-Cul1 ubiquitin ligase complex | $8.00 \times 10^{-03}$ | 2          | 4.166      |
| Elongin complex                            | $2.20 \times 10^{-02}$ | 2          | 4.166      |
| Midbody                                    | $4.20 \times 10^{-02}$ | 3          | 6.250      |
| Pseudopodium                               | $4.20 \times 10^{-02}$ | 2          | 4.166      |

COPS, COP9 signalosome.

Table SIII. Molecular function terms of the COPS subunits from Gene Ontology functional enrichment analysis.

| Description                                                                                                   | P-value                | Gene count | Gene ratio |
|---------------------------------------------------------------------------------------------------------------|------------------------|------------|------------|
| Ubiquitin-protein transferase activity                                                                        | $8.75 \times 10^{-18}$ | 18         | 37.500     |
| Ubiquitin protein ligase binding                                                                              | $8.87 \times 10^{-16}$ | 16         | 33.333     |
| Ubiquitin protein ligase activity                                                                             | $2.56 \times 10^{-15}$ | 14         | 29.166     |
| MAP kinase activity                                                                                           | $2.64 \times 10^{-10}$ | 6          | 12.500     |
| Protein binding                                                                                               | $5.22 \times 10^{-08}$ | 43         | 89.583     |
| NEDD8 transferase activity                                                                                    | $8.08 \times 10^{-08}$ | 4          | 8.333      |
| Cullin family protein binding                                                                                 | $7.21 \times 10^{-06}$ | 4          | 8.333      |
| Transcription factor binding                                                                                  | $1.25 \times 10^{-05}$ | 8          | 16.666     |
| JUN kinase activity                                                                                           | $2.27 \times 10^{-05}$ | 3          | 6.250      |
| Transcription factor activity, RNA polymerase II core promoter proximal region sequence-specific binding      | $3.44 \times 10^{-05}$ | 4          | 8.333      |
| Kinase activity                                                                                               | $5.35 \times 10^{-04}$ | 6          | 12.500     |
| Transcriptional activator activity, RNA polymerase II core promoter proximal region sequence-specific binding | $4.00 \times 10^{-03}$ | 5          | 10.416     |
| NEDD8 activating enzyme activity                                                                              | $5.00 \times 10^{-03}$ | 2          | 4.166      |
| Damaged DNA binding                                                                                           | $1.30 \times 10^{-02}$ | 3          | 6.250      |
| RNA polymerase II core promoter proximal region sequence-specific DNA binding                                 | $1.60 \times 10^{-02}$ | 5          | 10.416     |
| ATP binding                                                                                                   | $2.00 \times 10^{-02}$ | 10         | 20.833     |
| MAP kinase kinase activity                                                                                    | $3.30 \times 10^{-02}$ | 2          | 4.166      |
| Phosphotyrosine binding                                                                                       | $3.60 \times 10^{-02}$ | 2          | 4.166      |
| Protein heterodimerization activity                                                                           | $4.00 \times 10^{-02}$ | 5          | 10.416     |

COPS, COP9 signalosome.

Table SIV. Pathways from Kyoto Encyclopedia of Genes and Genomes analysis of the COPS subunits.

| Description                                                | P-value                | Gene count | Gene ratio |
|------------------------------------------------------------|------------------------|------------|------------|
| Ubiquitin mediated proteolysis                             | 4.83x10 <sup>-29</sup> | 23         | 47.916     |
| Osteoclast differentiation                                 | 1.00x10 <sup>-09</sup> | 11         | 22.916     |
| Renal cell carcinoma                                       | 4.43x10 <sup>-08</sup> | 8          | 16.666     |
| Hepatitis B                                                | 4.82x10 <sup>-08</sup> | 10         | 20.833     |
| Pathways in cancer                                         | 5.75x10 <sup>-08</sup> | 14         | 29.166     |
| Pertussis                                                  | 1.09x10 <sup>-07</sup> | 8          | 16.666     |
| Salmonella infection                                       | 2.21x10 <sup>-07</sup> | 8          | 16.666     |
| Colorectal cancer                                          | 7.83x10 <sup>-07</sup> | 7          | 14.583     |
| Chagas disease (American trypanosomiasis)                  | 1.05x10 <sup>-06</sup> | 8          | 16.666     |
| Toll-like receptor signaling pathway                       | 1.19x10 <sup>-06</sup> | 8          | 16.666     |
| TNF signaling pathway                                      | 1.27x10 <sup>-06</sup> | 8          | 16.666     |
| Prolactin signaling pathway                                | 1.76x10 <sup>-06</sup> | 7          | 14.583     |
| Herpes simplex infection                                   | 4.29x10 <sup>-06</sup> | 9          | 18.750     |
| Wnt signaling pathway                                      | 6.99x10 <sup>-06</sup> | 8          | 16.666     |
| GnRH signaling pathway                                     | 7.59x10 <sup>-06</sup> | 7          | 14.583     |
| HIF-1 signaling pathway                                    | 1.03x10 <sup>-05</sup> | 7          | 14.583     |
| NOD-like receptor signaling pathway                        | 1.07x10 <sup>-05</sup> | 6          | 12.500     |
| Choline metabolism in cancer                               | 1.39x10 <sup>-05</sup> | 7          | 14.583     |
| Shigellosis                                                | 2.06x10 <sup>-05</sup> | 6          | 12.500     |
| Fc epsilon RI signaling pathway                            | 2.77x10 <sup>-05</sup> | 6          | 12.500     |
| Neurotrophin signaling pathway                             | 3.71x10 <sup>-05</sup> | 7          | 14.583     |
| FoxO signaling pathway                                     | 6.91x10 <sup>-05</sup> | 7          | 14.583     |
| Progesterone-mediated oocyte maturation                    | 9.13x10 <sup>-05</sup> | 6          | 12.500     |
| ErbB signaling pathway                                     | 9.13x10 <sup>-05</sup> | 6          | 12.500     |
| Nucleotide excision repair                                 | 1.07x10 <sup>-04</sup> | 5          | 10.416     |
| Type II diabetes mellitus                                  | 1.16x10 <sup>-04</sup> | 5          | 10.416     |
| T cell receptor signaling pathway                          | 1.77x10 <sup>-04</sup> | 6          | 12.500     |
| Retrograde endocannabinoid signaling                       | 1.85x10 <sup>-04</sup> | 6          | 12.500     |
| Toxoplasmosis                                              | 2.77x10 <sup>-04</sup> | 6          | 12.500     |
| Influenza A                                                | 2.91x10 <sup>-04</sup> | 7          | 14.583     |
| MAPK signaling pathway                                     | 3.35x10 <sup>-04</sup> | 8          | 16.666     |
| Pancreatic cancer                                          | 3.79x10 <sup>-04</sup> | 5          | 10.416     |
| Sphingolipid signaling pathway                             | 4.14x10 <sup>-04</sup> | 6          | 12.500     |
| Epithelial cell signaling in Helicobacter pylori infection | 4.26x10 <sup>-04</sup> | 5          | 10.416     |
| Epstein-Barr virus infection                               | 4.47x10 <sup>-04</sup> | 6          | 12.500     |
| B cell receptor signaling pathway                          | 4.77x10 <sup>-04</sup> | 5          | 10.416     |
| Leishmaniasis                                              | 5.32x10 <sup>-04</sup> | 5          | 10.416     |
| Circadian rhythm                                           | 5.81x10 <sup>-04</sup> | 4          | 8.333      |
| cAMP signaling pathway                                     | 5.82x10 <sup>-04</sup> | 7          | 14.583     |
| Hepatitis C                                                | 6.64x10 <sup>-04</sup> | 6          | 12.500     |
| TGF-beta signaling pathway                                 | 1.00x10 <sup>-03</sup> | 5          | 10.416     |
| Protein processing in endoplasmic reticulum                | 2.00x10 <sup>-03</sup> | 6          | 12.500     |
| Tuberculosis                                               | 2.00x10 <sup>-03</sup> | 6          | 12.500     |
| Oocyte meiosis                                             | 3.00x10 <sup>-03</sup> | 5          | 10.416     |
| VEGF signaling pathway                                     | 4.00x10 <sup>-03</sup> | 4          | 8.333      |
| Focal adhesion                                             | 5.00x10 <sup>-03</sup> | 6          | 12.500     |
| Dopaminergic synapse                                       | 5.00x10 <sup>-03</sup> | 5          | 10.416     |
| RIG-I-like receptor signaling pathway                      | 6.00x10 <sup>-03</sup> | 4          | 8.333      |
| Insulin signaling pathway                                  | 6.00x10 <sup>-03</sup> | 5          | 10.416     |
| Oxytocin signaling pathway                                 | 8.00x10 <sup>-03</sup> | 5          | 10.416     |
| Prion diseases                                             | 1.40x10 <sup>-02</sup> | 3          | 6.250      |
| Inflammatory mediator regulation of TRP channels           | 1.50x10 <sup>-02</sup> | 4          | 8.333      |

Table SIV. Continued.

| Description                       | P-value                | Gene count | Gene ratio |
|-----------------------------------|------------------------|------------|------------|
| Estrogen signaling pathway        | $1.60 \times 10^{-02}$ | 4          | 8.333      |
| Viral carcinogenesis              | $2.30 \times 10^{-02}$ | 5          | 10.416     |
| Cell cycle                        | $2.80 \times 10^{-02}$ | 4          | 8.333      |
| Ras signaling pathway             | $3.20 \times 10^{-02}$ | 5          | 10.416     |
| Non-alcoholic fatty liver disease | $4.70 \times 10^{-02}$ | 4          | 8.333      |
| Amphetamine addiction             | $4.90 \times 10^{-02}$ | 3          | 6.250      |
| COPS, COP9 signalosome.           |                        |            |            |



Table SV. Gene Set Enrichment analysis of high expression of COPS5 using Hallmark annotation.

| Name                                     | Counts | Es     | Nes    | Nom<br>P-value         | FDR<br>q-value         | Fwer<br>P-value        |
|------------------------------------------|--------|--------|--------|------------------------|------------------------|------------------------|
| HALLMARK_DNA_REPAIR                      | 148    | -0.778 | -2.332 | 0                      | 0                      | 0                      |
| HALLMARK_UV_RESPONSE_UP                  | 156    | -0.651 | -2.310 | 0                      | 0                      | 0                      |
| HALLMARK_UNFOLDED_PROTEIN_RESPONSE       | 110    | -0.783 | -2.244 | 0                      | 0                      | 0                      |
| HALLMARK_MTORC1_SIGNALING                | 198    | -0.724 | -2.216 | 0                      | 2.88x10 <sup>-04</sup> | 1.00x10 <sup>-03</sup> |
| HALLMARK_MYC_TARGETS_V1                  | 197    | -0.851 | -2.211 | 0                      | 2.30x10 <sup>-04</sup> | 1.00x10 <sup>-03</sup> |
| HALLMARK_GLYCOLYSIS                      | 197    | -0.638 | -2.168 | 0                      | 4.53x10 <sup>-04</sup> | 2.00x10 <sup>-03</sup> |
| HALLMARK_PI3K_AKT_MTOR_SIGNALING         | 104    | -0.703 | -2.137 | 0                      | 8.70x10 <sup>-04</sup> | 5.00x10 <sup>-03</sup> |
| HALLMARK_G2M_CHECKPOINT                  | 192    | -0.804 | -2.129 | 0                      | 9.05x10 <sup>-04</sup> | 6.00x10 <sup>-03</sup> |
| HALLMARK_MYC_TARGETS_V2                  | 58     | -0.859 | -2.128 | 0                      | 8.04x10 <sup>-04</sup> | 6.00x10 <sup>-03</sup> |
| HALLMARK_P53_PATHWAY                     | 197    | -0.613 | -2.118 | 0                      | 7.24x10 <sup>-04</sup> | 6.00x10 <sup>-03</sup> |
| HALLMARK_E2F_TARGETS                     | 197    | -0.824 | -2.116 | 0                      | 6.58x10 <sup>-04</sup> | 6.00x10 <sup>-03</sup> |
| HALLMARK_PROTEIN_SECRETION               | 95     | -0.766 | -2.109 | 0                      | 9.84x10 <sup>-04</sup> | 8.00x10 <sup>-03</sup> |
| HALLMARK_ADIPOGENESIS                    | 194    | -0.655 | -2.108 | 0                      | 9.08x10 <sup>-04</sup> | 8.00x10 <sup>-03</sup> |
| HALLMARK_HEME_METABOLISM                 | 197    | -0.605 | -2.071 | 0                      | 1.00x10 <sup>-03</sup> | 1.10x10 <sup>-02</sup> |
| HALLMARK_OXIDATIVE_PHOSPHORYLATION       | 184    | -0.731 | -2.055 | 0                      | 1.00x10 <sup>-03</sup> | 1.30x10 <sup>-02</sup> |
| HALLMARK_APOPTOSIS                       | 160    | -0.599 | -2.054 | 0                      | 1.00x10 <sup>-03</sup> | 1.30x10 <sup>-02</sup> |
| HALLMARK_MITOTIC_SPINDLE                 | 198    | -0.701 | -1.976 | 0                      | 3.00x10 <sup>-03</sup> | 2.30x10 <sup>-02</sup> |
| HALLMARK_PEROXISOME                      | 104    | -0.593 | -1.961 | 0                      | 3.00x10 <sup>-03</sup> | 2.90x10 <sup>-02</sup> |
| HALLMARK_ESTROGEN_RESPONSE_LATE          | 197    | -0.510 | -1.921 | 0                      | 5.00x10 <sup>-03</sup> | 5.30x10 <sup>-02</sup> |
| HALLMARK_FATTY_ACID_METABOLISM           | 157    | -0.587 | -1.919 | 3.00x10 <sup>-03</sup> | 5.00x10 <sup>-03</sup> | 5.30x10 <sup>-02</sup> |
| HALLMARK_APICAL_JUNCTION                 | 194    | -0.553 | -1.875 | 4.00x10 <sup>-03</sup> | 8.00x10 <sup>-03</sup> | 7.70x10 <sup>-02</sup> |
| HALLMARK_SPERMATOGENESIS                 | 135    | -0.516 | -1.864 | 2.00x10 <sup>-03</sup> | 8.00x10 <sup>-03</sup> | 8.10x10 <sup>-02</sup> |
| HALLMARK_HYPOXIA                         | 191    | -0.527 | -1.849 | 5.00x10 <sup>-03</sup> | 9.00x10 <sup>-03</sup> | 8.50x10 <sup>-02</sup> |
| HALLMARK_ANDROGEN_RESPONSE               | 96     | -0.587 | -1.824 | 0                      | 1.20x10 <sup>-02</sup> | 1.00x10 <sup>-01</sup> |
| HALLMARK_COMPLEMENT                      | 199    | -0.533 | -1.811 | 1.40x10 <sup>-02</sup> | 1.30x10 <sup>-02</sup> | 1.10x10 <sup>-01</sup> |
| HALLMARK_TGF_β_SIGNALING                 | 54     | -0.647 | -1.808 | 1.40x10 <sup>-02</sup> | 1.30x10 <sup>-02</sup> | 1.12x10 <sup>-01</sup> |
| HALLMARK_WNT_β_CATENIN_SIGNALING         | 42     | -0.614 | -1.791 | 2.00x10 <sup>-03</sup> | 1.50x10 <sup>-02</sup> | 1.24x10 <sup>-01</sup> |
| HALLMARK_NOTCH_SIGNALING                 | 32     | -0.614 | -1.790 | 6.00x10 <sup>-03</sup> | 1.40x10 <sup>-02</sup> | 1.24x10 <sup>-01</sup> |
| HALLMARK_IL2_STAT5_SIGNALING             | 196    | -0.511 | -1.779 | 2.10x10 <sup>-02</sup> | 1.50x10 <sup>-02</sup> | 1.31x10 <sup>-01</sup> |
| HALLMARK_REACTIVE_OXYGEN_SPECIES_PATHWAY | 47     | -0.601 | -1.772 | 1.90x10 <sup>-02</sup> | 1.50x10 <sup>-02</sup> | 1.34x10 <sup>-01</sup> |
| HALLMARK_XENOBIOTIC_METABOLISM           | 199    | -0.473 | -1.751 | 9.00x10 <sup>-03</sup> | 1.80x10 <sup>-02</sup> | 1.54x10 <sup>-01</sup> |
| HALLMARK_TNFA_SIGNALING_VIA_NFKB         | 198    | -0.531 | -1.691 | 4.70x10 <sup>-02</sup> | 2.80x10 <sup>-02</sup> | 2.15x10 <sup>-01</sup> |
| HALLMARK_ESTROGEN_RESPONSE_EARLY         | 195    | -0.474 | -1.668 | 2.20x10 <sup>-02</sup> | 3.30x10 <sup>-02</sup> | 2.35x10 <sup>-01</sup> |
| HALLMARK_CHOLESTEROL_HOMEOSTASIS         | 74     | -0.510 | -1.657 | 2.90x10 <sup>-02</sup> | 3.50x10 <sup>-02</sup> | 2.51x10 <sup>-01</sup> |
| HALLMARK_INTERFERON_γ_RESPONSE           | 199    | -0.607 | -1.649 | 4.80x10 <sup>-02</sup> | 3.50x10 <sup>-02</sup> | 2.57x10 <sup>-01</sup> |
| HALLMARK_INTERFERON_α_RESPONSE           | 95     | -0.711 | -1.643 | 4.80x10 <sup>-02</sup> | 3.50x10 <sup>-02</sup> | 2.64x10 <sup>-01</sup> |
| HALLMARK_BILE_ACID_METABOLISM            | 112    | -0.466 | -1.627 | 3.80x10 <sup>-02</sup> | 3.80x10 <sup>-02</sup> | 2.82x10 <sup>-01</sup> |
| HALLMARK_PANCREAS_β_CELLS                | 40     | -0.492 | -1.583 | 1.40x10 <sup>-02</sup> | 4.70x10 <sup>-02</sup> | 3.32x10 <sup>-01</sup> |

ES, enrichment score; FDR, false discovery rate; FWER, family-wise error rate; NES, normalized enrichment score; NOM, nominal.



Table SVI. Gene Set Enrichment Analysis of high expression of COPS6 using Hallmark annotation.

| Name                                     | Counts | Es     | Nes    | Nom<br>P-value         | FDR<br>q-value         | Fwer<br>P-value        |
|------------------------------------------|--------|--------|--------|------------------------|------------------------|------------------------|
| HALLMARK_DNA_REPAIR                      | 148    | -0.782 | -2.314 | 0                      | 0                      | 0                      |
| HALLMARK_UV_RESPONSE_UP                  | 156    | -0.645 | -2.277 | 0                      | 0                      | 0                      |
| HALLMARK_MYC_TARGETS_V1                  | 197    | -0.855 | -2.255 | 0                      | 0                      | 0                      |
| HALLMARK_OXIDATIVE_PHOSPHORYLATION       | 184    | -0.793 | -2.201 | 0                      | 0                      | 0                      |
| HALLMARK_UNFOLDED_PROTEIN_RESPONSE       | 110    | -0.764 | -2.199 | 0                      | 0                      | 0                      |
| HALLMARK_ADIPOGENESIS                    | 194    | -0.700 | -2.193 | 0                      | 0                      | 0                      |
| HALLMARK_MTORC1_SIGNALING                | 198    | -0.712 | -2.190 | 0                      | 0                      | 0                      |
| HALLMARK_P53_PATHWAY                     | 197    | -0.622 | -2.158 | 0                      | 4.23x10 <sup>-04</sup> | 1.00x10 <sup>-03</sup> |
| HALLMARK_GLYCOLYSIS                      | 197    | -0.643 | -2.150 | 0                      | 3.76x10 <sup>-04</sup> | 1.00x10 <sup>-03</sup> |
| HALLMARK_FATTY_ACID_METABOLISM           | 157    | -0.654 | -2.105 | 0                      | 5.44x10 <sup>-04</sup> | 3.00x10 <sup>-03</sup> |
| HALLMARK_PEROXISOME                      | 104    | -0.643 | -2.078 | 0                      | 7.48x10 <sup>-04</sup> | 5.00x10 <sup>-03</sup> |
| HALLMARK_XENOBIOTIC_METABOLISM           | 199    | -0.563 | -2.048 | 2.00x10 <sup>-03</sup> | 2.00x10 <sup>-03</sup> | 1.20x10 <sup>-02</sup> |
| HALLMARK_E2F_TARGETS                     | 197    | -0.823 | -2.046 | 0                      | 1.00x10 <sup>-03</sup> | 1.20x10 <sup>-02</sup> |
| HALLMARK_PI3K_AKT_MTOR_SIGNALING         | 104    | -0.684 | -2.043 | 0                      | 1.00x10 <sup>-03</sup> | 1.20x10 <sup>-02</sup> |
| HALLMARK_HEME_METABOLISM                 | 197    | -0.603 | -2.030 | 0                      | 2.00x10 <sup>-03</sup> | 1.40x10 <sup>-02</sup> |
| HALLMARK_MYC_TARGETS_V2                  | 58     | -0.841 | -2.026 | 2.00x10 <sup>-03</sup> | 2.00x10 <sup>-03</sup> | 1.50x10 <sup>-02</sup> |
| HALLMARK_APOPTOSIS                       | 160    | -0.602 | -2.012 | 0                      | 2.00x10 <sup>-03</sup> | 1.80x10 <sup>-02</sup> |
| HALLMARK_ESTROGEN_RESPONSE_LATE          | 197    | -0.545 | -2.010 | 2.00x10 <sup>-03</sup> | 2.00x10 <sup>-03</sup> | 1.80x10 <sup>-02</sup> |
| HALLMARK_REACTIVE_OXYGEN_SPECIES_PATHWAY | 47     | -0.680 | -2.005 | 2.00x10 <sup>-03</sup> | 2.00x10 <sup>-03</sup> | 1.80x10 <sup>-02</sup> |
| HALLMARK_CHOLESTEROL_HOMEOSTASIS         | 74     | -0.619 | -1.990 | 2.00x10 <sup>-03</sup> | 2.00x10 <sup>-03</sup> | 2.10x10 <sup>-02</sup> |
| HALLMARK_G2M_CHECKPOINT                  | 192    | -0.751 | -1.987 | 0                      | 2.00x10 <sup>-03</sup> | 2.10x10 <sup>-02</sup> |
| HALLMARK_MITOTIC_SPINDLE                 | 198    | -0.704 | -1.949 | 0                      | 3.00x10 <sup>-03</sup> | 2.80x10 <sup>-02</sup> |
| HALLMARK_WNT_β_CATENIN_SIGNALING         | 42     | -0.659 | -1.902 | 0                      | 5.00x10 <sup>-03</sup> | 5.80x10 <sup>-02</sup> |
| HALLMARK_PROTEIN_SECRETION               | 95     | -0.687 | -1.883 | 4.00x10 <sup>-03</sup> | 6.00x10 <sup>-03</sup> | 6.10x10 <sup>-02</sup> |
| HALLMARK_SPERMATOGENESIS                 | 135    | -0.517 | -1.839 | 0                      | 9.00x10 <sup>-03</sup> | 8.90x10 <sup>-02</sup> |
| HALLMARK_HYPOXIA                         | 191    | -0.540 | -1.840 | 1.10x10 <sup>-02</sup> | 9.00x10 <sup>-03</sup> | 8.90x10 <sup>-02</sup> |
| HALLMARK_BILE_ACID_METABOLISM            | 112    | -0.540 | -1.834 | 3.00x10 <sup>-03</sup> | 9.00x10 <sup>-03</sup> | 8.90x10 <sup>-02</sup> |
| HALLMARK_ANDROGEN_RESPONSE               | 96     | -0.593 | -1.810 | 4.00x10 <sup>-03</sup> | 1.10x10 <sup>-02</sup> | 1.08x10 <sup>-01</sup> |
| HALLMARK_APICAL_JUNCTION                 | 194    | -0.533 | -1.767 | 6.00x10 <sup>-03</sup> | 1.60x10 <sup>-02</sup> | 1.34x10 <sup>-01</sup> |
| HALLMARK_NOTCH_SIGNALING                 | 32     | -0.598 | -1.697 | 9.00x10 <sup>-03</sup> | 2.70x10 <sup>-02</sup> | 2.04x10 <sup>-01</sup> |
| HALLMARK_IL2_STAT5_SIGNALING             | 196    | -0.495 | -1.675 | 2.20x10 <sup>-02</sup> | 3.10x10 <sup>-02</sup> | 2.29x10 <sup>-01</sup> |
| HALLMARK_ESTROGEN_RESPONSE_EARLY         | 195    | -0.481 | -1.657 | 3.20x10 <sup>-02</sup> | 3.40x10 <sup>-02</sup> | 2.44x10 <sup>-01</sup> |
| HALLMARK_COMPLEMENT                      | 199    | -0.499 | -1.641 | 4.40x10 <sup>-02</sup> | 3.70x10 <sup>-02</sup> | 2.62x10 <sup>-01</sup> |
| HALLMARK_APICAL_SURFACE                  | 43     | -0.476 | -1.545 | 3.20x10 <sup>-02</sup> | 6.50x10 <sup>-02</sup> | 3.79x10 <sup>-01</sup> |

ES, enrichment score; FDR, false discovery rate; FWER, family-wise error rate; NES, normalized enrichment score; NOM, nominal.

Table SVII. Gene Set Enrichment Analysis of high expression of COPS8 in Hallmark annotation.

| Name                                       | Counts | Es     | Nes    | Nom<br>P-value         | FDR<br>q-value         | Fwer<br>P-value        |
|--------------------------------------------|--------|--------|--------|------------------------|------------------------|------------------------|
| HALLMARK_UV_RESPONSE_UP                    | 156    | -0.627 | -2.268 | 0                      | 1.00x10 <sup>-03</sup> | 1.00x10 <sup>-03</sup> |
| HALLMARK_APOPTOSIS                         | 160    | -0.643 | -2.252 | 0                      | 5.47x10 <sup>-04</sup> | 1.00x10 <sup>-03</sup> |
| HALLMARK_GLYCOLYSIS                        | 197    | -0.657 | -2.243 | 0                      | 3.64x10 <sup>-04</sup> | 1.00x10 <sup>-03</sup> |
| HALLMARK_APICAL_JUNCTION                   | 194    | -0.649 | -2.231 | 0                      | 2.73x10 <sup>-04</sup> | 1.00x10 <sup>-03</sup> |
| HALLMARK_DNA_REPAIR                        | 148    | -0.740 | -2.213 | 0                      | 6.30x10 <sup>-04</sup> | 2.00x10 <sup>-03</sup> |
| HALLMARK_HYPOXIA                           | 191    | -0.620 | -2.205 | 0                      | 5.25x10 <sup>-04</sup> | 2.00x10 <sup>-03</sup> |
| HALLMARK_ANDROGEN_RESPONSE                 | 96     | -0.694 | -2.170 | 0                      | 4.50x10 <sup>-04</sup> | 2.00x10 <sup>-03</sup> |
| HALLMARK_ADIPOGENESIS                      | 194    | -0.660 | -2.169 | 0                      | 3.94x10 <sup>-04</sup> | 2.00x10 <sup>-03</sup> |
| HALLMARK_MITOTIC_SPINDLE                   | 198    | -0.761 | -2.165 | 0                      | 4.64x10 <sup>-04</sup> | 2.00x10 <sup>-03</sup> |
| HALLMARK_HEME_METABOLISM                   | 197    | -0.620 | -2.148 | 0                      | 6.23x10 <sup>-04</sup> | 2.00x10 <sup>-03</sup> |
| HALLMARK_UNFOLDED_PROTEIN_RESPONSE         | 110    | -0.747 | -2.140 | 0                      | 7.66x10 <sup>-04</sup> | 3.00x10 <sup>-03</sup> |
| HALLMARK_PROTEIN_SECRETION                 | 95     | -0.773 | -2.138 | 2.00x10 <sup>-03</sup> | 7.02x10 <sup>-04</sup> | 3.00x10 <sup>-03</sup> |
| HALLMARK_IL2_STAT5_SIGNALING               | 196    | -0.599 | -2.134 | 2.00x10 <sup>-03</sup> | 9.01x10 <sup>-04</sup> | 5.00x10 <sup>-03</sup> |
| HALLMARK_UV_RESPONSE_DN                    | 137    | -0.704 | -2.133 | 0                      | 8.36x10 <sup>-04</sup> | 5.00x10 <sup>-03</sup> |
| HALLMARK_PI3K_AKT_MTOR_SIGNALING           | 104    | -0.684 | -2.117 | 2.00x10 <sup>-03</sup> | 1.00x10 <sup>-03</sup> | 5.00x10 <sup>-03</sup> |
| HALLMARK_G2M_CHECKPOINT                    | 192    | -0.765 | -2.113 | 0                      | 9.97x10 <sup>-04</sup> | 5.00x10 <sup>-03</sup> |
| HALLMARK_WNT_β_CATENIN_SIGNALING           | 42     | -0.718 | -2.100 | 0                      | 9.38x10 <sup>-04</sup> | 5.00x10 <sup>-03</sup> |
| HALLMARK_MTORC1_SIGNALING                  | 198    | -0.677 | -2.095 | 0                      | 9.47x10 <sup>-04</sup> | 5.00x10 <sup>-03</sup> |
| HALLMARK_TGF_β_SIGNALING                   | 54     | -0.752 | -2.073 | 0                      | 1.00x10 <sup>-03</sup> | 7.00x10 <sup>-03</sup> |
| HALLMARK_E2F_TARGETS                       | 197    | -0.784 | -2.060 | 0                      | 1.00x10 <sup>-03</sup> | 7.00x10 <sup>-03</sup> |
| HALLMARK_KRAS_SIGNALING_UP                 | 195    | -0.569 | -2.047 | 2.00x10 <sup>-03</sup> | 9.95x10 <sup>-04</sup> | 7.00x10 <sup>-03</sup> |
| HALLMARK_MYC_TARGETS_V1                    | 197    | -0.769 | -2.044 | 0                      | 9.50x10 <sup>-04</sup> | 7.00x10 <sup>-03</sup> |
| HALLMARK_P53_PATHWAY                       | 197    | -0.598 | -2.043 | 0                      | 9.55x10 <sup>-04</sup> | 8.00x10 <sup>-03</sup> |
| HALLMARK_NOTCH_SIGNALING                   | 32     | -0.689 | -2.025 | 0                      | 1.00x10 <sup>-03</sup> | 1.30x10 <sup>-02</sup> |
| HALLMARK_EPITHELIAL_MESENCHYMAL_TRANSITION | 197    | -0.713 | -2.014 | 0                      | 2.00x10 <sup>-03</sup> | 1.60x10 <sup>-02</sup> |
| HALLMARK_FATTY_ACID_METABOLISM             | 157    | -0.595 | -2.001 | 0                      | 2.00x10 <sup>-03</sup> | 2.00x10 <sup>-02</sup> |
| HALLMARK_ANGIOGENESIS                      | 36     | -0.719 | -2.001 | 0                      | 2.00x10 <sup>-03</sup> | 2.10x10 <sup>-02</sup> |
| HALLMARK_COMPLEMENT                        | 199    | -0.596 | -1.992 | 6.00x10 <sup>-03</sup> | 2.00x10 <sup>-03</sup> | 2.30x10 <sup>-02</sup> |
| HALLMARK_OXIDATIVE_PHOSPHORYLATION         | 184    | -0.671 | -1.987 | 1.20x10 <sup>-02</sup> | 2.00x10 <sup>-03</sup> | 2.30x10 <sup>-02</sup> |
| HALLMARK_XENOBIOTIC_METABOLISM             | 199    | -0.531 | -1.967 | 0                      | 2.00x10 <sup>-03</sup> | 2.70x10 <sup>-02</sup> |
| HALLMARK_TNFA_SIGNALING_VIA_NFKB           | 198    | -0.615 | -1.951 | 6.00x10 <sup>-03</sup> | 3.00x10 <sup>-03</sup> | 3.10x10 <sup>-02</sup> |
| HALLMARK_SPERMATOGENESIS                   | 135    | -0.520 | -1.940 | 0                      | 3.00x10 <sup>-03</sup> | 3.30x10 <sup>-02</sup> |
| HALLMARK_HEDGEHOG_SIGNALING                | 35     | -0.655 | -1.934 | 0                      | 3.00x10 <sup>-03</sup> | 3.60x10 <sup>-02</sup> |
| HALLMARK_PEROXISOME                        | 104    | -0.579 | -1.926 | 2.00x10 <sup>-03</sup> | 3.00x10 <sup>-03</sup> | 4.00x10 <sup>-02</sup> |
| HALLMARK_ESTROGEN_RESPONSE_EARLY           | 195    | -0.534 | -1.919 | 4.00x10 <sup>-03</sup> | 3.00x10 <sup>-03</sup> | 4.30x10 <sup>-02</sup> |
| HALLMARK_IL6_JAK_STAT3_SIGNALING           | 86     | -0.609 | -1.886 | 8.00x10 <sup>-03</sup> | 4.00x10 <sup>-03</sup> | 6.30x10 <sup>-02</sup> |
| HALLMARK_INFLAMMATORY_RESPONSE             | 198    | -0.584 | -1.884 | 6.00x10 <sup>-03</sup> | 4.00x10 <sup>-03</sup> | 6.40x10 <sup>-02</sup> |
| HALLMARK_ESTROGEN_RESPONSE_LATE            | 197    | -0.493 | -1.841 | 4.00x10 <sup>-03</sup> | 6.00x10 <sup>-03</sup> | 8.50x10 <sup>-02</sup> |
| HALLMARK_PANCREAS_β_CELLS                  | 40     | -0.563 | -1.838 | 0                      | 6.00x10 <sup>-03</sup> | 8.90x10 <sup>-02</sup> |
| HALLMARK_MYC_TARGETS_V2                    | 58     | -0.741 | -1.825 | 2.00x10 <sup>-03</sup> | 6.00x10 <sup>-03</sup> | 9.40x10 <sup>-02</sup> |
| HALLMARK_COAGULATION                       | 138    | -0.538 | -1.819 | 8.00x10 <sup>-03</sup> | 7.00x10 <sup>-03</sup> | 9.90x10 <sup>-02</sup> |
| HALLMARK_ALLOGRAFT_REJECTION               | 199    | -0.574 | -1.743 | 4.00x10 <sup>-02</sup> | 1.40x10 <sup>-02</sup> | 1.69x10 <sup>-01</sup> |
| HALLMARK_BILE_ACID_METABOLISM              | 112    | -0.500 | -1.740 | 1.10x10 <sup>-02</sup> | 1.40x10 <sup>-02</sup> | 1.71x10 <sup>-01</sup> |
| HALLMARK_REACTIVE_OXYGEN_SPECIES_PATHWAY   | 47     | -0.579 | -1.732 | 1.10x10 <sup>-02</sup> | 1.50x10 <sup>-02</sup> | 1.75x10 <sup>-01</sup> |
| HALLMARK_CHOLESTEROL_HOMEOSTASIS           | 74     | -0.537 | -1.725 | 1.50x10 <sup>-02</sup> | 1.50x10 <sup>-02</sup> | 1.86x10 <sup>-01</sup> |
| HALLMARK_APICAL_SURFACE                    | 43     | -0.496 | -1.645 | 1.50x10 <sup>-02</sup> | 2.70x10 <sup>-02</sup> | 2.69x10 <sup>-01</sup> |
| HALLMARK_KRAS_SIGNALING_DN                 | 195    | -0.386 | -1.575 | 2.40x10 <sup>-02</sup> | 4.20x10 <sup>-02</sup> | 3.51x10 <sup>-01</sup> |

ES, enrichment score; FDR, false discovery rate; FWER, family-wise error rate; NES, normalized enrichment score; NOM, nominal.

Table SVIII. CERES score of the COPS subunits in the head and neck squamous cell carcinoma cell lines.

| Cell line | CERES SCORE |          |          |          |          |          |          |          |          |          |
|-----------|-------------|----------|----------|----------|----------|----------|----------|----------|----------|----------|
|           | COPS1       | COPS2    | COPS3    | COPS4    | COPS5    | COPS6    | COPS7A   | COPS7B   | COPS8    | COPS9    |
| SCC9      | -1.28934    | -0.66186 | -1.22417 | -1.24944 | -1.16996 | -1.74139 | -0.06412 | -0.0028  | -1.21462 | -0.43712 |
| BICR31    | -1.00316    | -0.64892 | -1.38969 | -0.99958 | -1.18269 | -1.57543 | -0.32725 | 0.334408 | -0.90385 | -0.27625 |
| SCC4      | -1.04122    | -0.68956 | -1.13561 | -0.98027 | -1.10797 | -1.00064 | -0.03847 | 0.115902 | -0.72334 | -0.02167 |
| BICR6     | -1.37128    | -0.88969 | -1.45932 | -1.18533 | -1.42743 | -1.65818 | -0.0239  | 0.158193 | -1.22956 | -0.41849 |
| HSC2      | -0.97339    | -0.49881 | -1.05116 | -0.97342 | -1.34365 | -1.55188 | -0.08035 | 0.241614 | -1.01897 | -0.17959 |
| SNU46     | -1.02281    | -0.26952 | -1.64207 | -1.42176 | -0.75256 | -1.46351 | 0.19913  | 0.387861 | -1.19944 | -0.02277 |
| BICR16    | -1.27399    | -0.65448 | -0.90978 | -1.5647  | -1.31868 | -1.5756  | -0.66187 | 0.276205 | -1.16554 | -0.12389 |
| CAL33     | -1.33496    | -0.82783 | -1.26041 | -1.24421 | -1.22647 | -1.96546 | -0.25247 | 0.100612 | -1.01106 | -0.3496  |
| BHY       | -1.1153     | -0.68258 | -1.19977 | -1.16481 | -1.4294  | -1.68529 | -0.11417 | 0.147281 | -1.16541 | -0.3494  |
| SNU1076   | -1.15394    | -0.47483 | -1.17187 | -1.29453 | -1.19382 | -1.76827 | -0.20979 | 0.097881 | -1.21114 | -0.32702 |
| PECAPJ34  | -0.90251    | -0.81858 | -1.0207  | -1.07345 | -1.19684 | -1.5041  | 0.100057 | 0.069725 | -0.78916 | -0.60219 |
| CLONEC12  |             |          |          |          |          |          |          |          |          |          |
| SNU1041   | -1.19455    | -0.89721 | -1.12502 | -1.25261 | -1.40313 | -1.83789 | 0.000802 | 0.216124 | -1.12394 | -0.23212 |
| PECAPJ15  | -1.22508    | -0.8439  | -1.255   | -1.43533 | -1.5806  | -1.30705 | -0.0195  | 0.167109 | -1.00942 | -0.38314 |
| YD8       | -1.03407    | -0.83597 | -1.12926 | -0.93722 | -1.30552 | -1.60048 | -0.37294 | 0.269899 | -1.33473 | -0.21245 |
| SNU1066   | -1.34675    | -1.0735  | -1.39344 | -1.66302 | -1.31321 | -1.50439 | -0.51127 | 0.130286 | -1.18701 | -0.53291 |
| PECAPJ41  | -1.13937    | -0.77267 | -1.15171 | -1.0099  | -0.87715 | -1.30251 | -0.22419 | 0.077994 | -0.96826 | -0.60421 |
| CLONED2   |             |          |          |          |          |          |          |          |          |          |
| PECAPJ49  | -1.03551    | -0.81406 | -1.18803 | -1.12162 | -0.97153 | -1.76352 | -0.15102 | 0.125814 | -0.95677 | -0.23279 |
| A253      | -1.20051    | -0.9579  | -1.2889  | -1.46499 | -1.1688  | -1.63601 | -0.24868 | 0.229367 | -1.02174 | -0.21491 |
| YD38      | -1.14614    | -0.93706 | -1.03643 | -1.03843 | -1.37084 | -1.71803 | -0.20689 | 0.340158 | -0.77187 | 0.011194 |
| BICR56    | -1.24409    | -0.76651 | -1.25522 | -1.35289 | -1.39892 | -1.72609 | -0.26801 | 0.15419  | -1.26355 | -0.57121 |
| HSC3      | -1.17914    | -1.23168 | -1.17379 | -1.09276 | -1.59412 | -1.87178 | -0.32912 | 0.376717 | -0.95882 | -0.21834 |

COPS, COP9 signalosome.
